# Supplementary material
Source: ML conference proceedings conference paper supplement (https://www.ecva.net/papers/eccv_2020/papers_ECCV/html/123530596_ECCV_2020_paper.php)

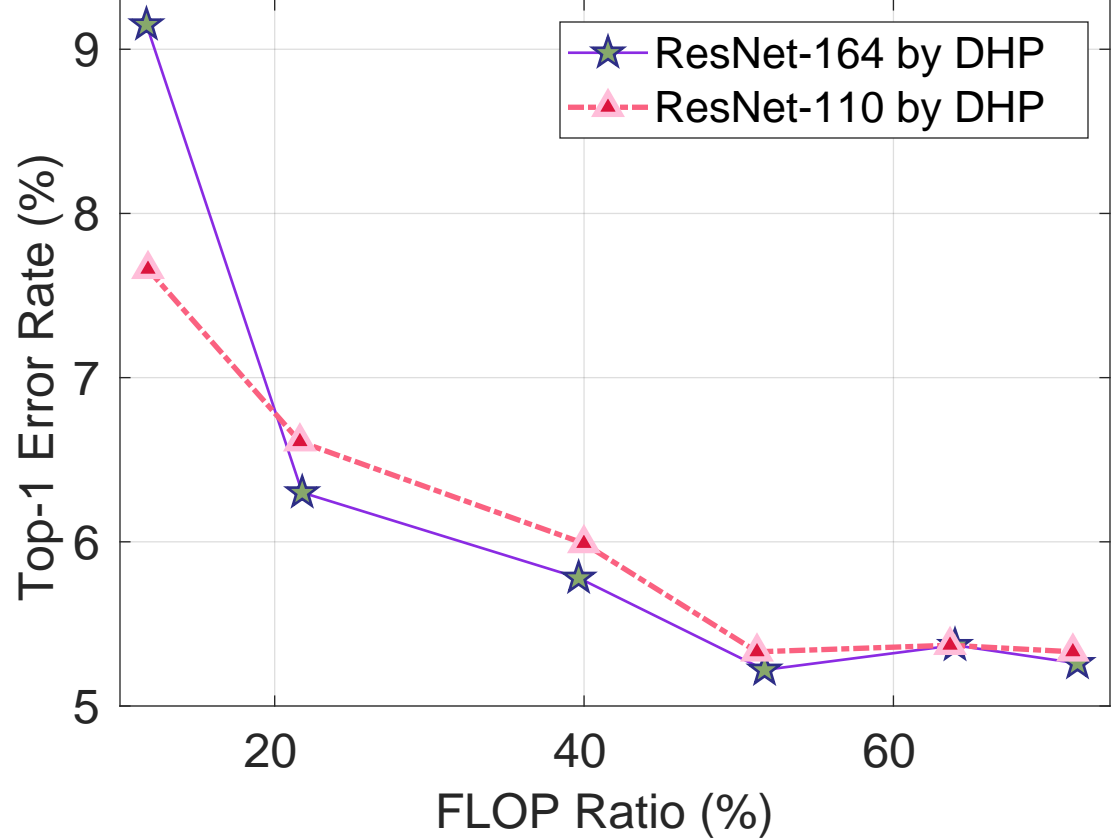

Supplement: Supplementary file 1 [file 123530596-supp.zip]

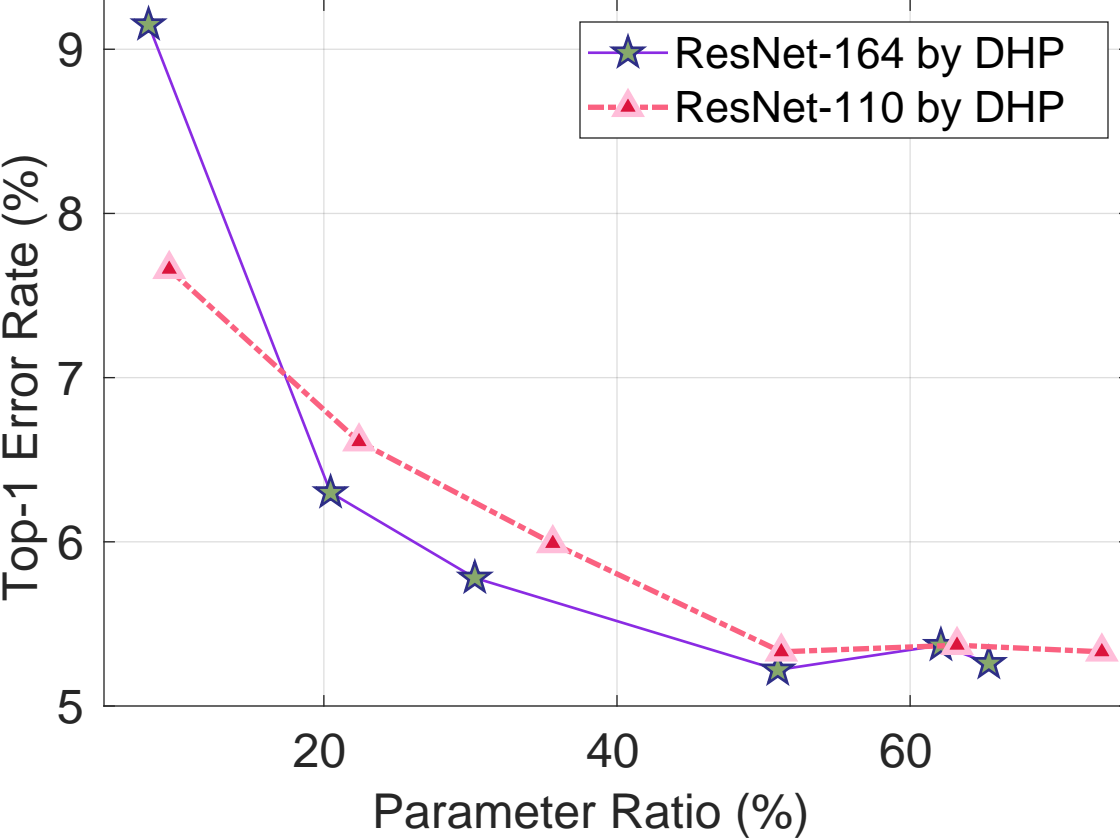

Supplement: Supplementary file 3 [file 123530596-supp.zip]
